# Supplementary material for: Mental Health Biobanks—A Systematic Review on the Prevalence, Creation, and Implementation of Mental Health Biobanks Globally
Source: MDPI journal article supplement (doi:10.3390/psychiatryint5010001), 2023-12-28
Supplement: s1 [file s1]

**Supplementary Table S1.** Literature search strategy used for the PubMed/Medline(OVID) database.

| Topic            | Keyword/MeSH Terms                                                                                                                                                                                                                                       |
|------------------|----------------------------------------------------------------------------------------------------------------------------------------------------------------------------------------------------------------------------------------------------------|
| Mental Disorders | "Mental Health" [MeSH Terms] OR mental*[tiab] OR psych*[tiab]) AND health[tiab] OR disorder*[tiab] OR ill*[tiab] OR ("Mental Disorders") OR ("Mental Health") OR (((mental*[tiab] OR psych*[tiab]) AND (health[tiab] OR disorder*[tiab] OR ill*[tiab]))) |
| Biobank          | "Biological specimen bank" [MeSH Terms] OR biobank*.ti,ab. ("biological specimen banks") OR (biobank*.ti,ab.)                                                                                                                                            |

*Note.* Similar search terms were used for all database searches.
